# Supplementary material for: Sports‐related ocular injuries at a tertiary eye hospital in Australia: A 5‐year retrospective descriptive study
Source: PubMed Central journal article supplement — Emerg Med Australas. 2022 Apr 18;34(5):794–800. doi: 10.1111/1742-6723.13982 (PMC9790689; doi:10.1111/1742-6723.13982), 2022-04-18
Supplement: EMM-34-794-s001.pdf [file EMM-34-794-s001.pdf]

## APPENDIX

## List of complete search terms:

| Base term  | Search Term     | Comment                                                                             |
|------------|-----------------|-------------------------------------------------------------------------------------|
| Sport      | sport           | leading space required to exclude "transport"                                       |
| Game       | game            |                                                                                     |
| Match      | match           |                                                                                     |
| Ball       | ball[ ./>()"]   | trailing punctuation added to exclude "Ballarat", "globally", "verbally", "balloon" |
| Ball       | baller[ ./>()"] | e.g. "netballer", trailing punctuation added to exclude misspellings of "Ballarat"  |
| Ball       | balling         | e.g. paintballing                                                                   |
| Squash     | squash[^ed]     | exclude "squashed"                                                                  |
| Squash     | sqash[^ed]      | Misspelling of squash                                                               |
| Tennis     | tennis          |                                                                                     |
| Tennis     | tenis[ ]        | Misspelling of tennis, trailing space added to exclude misspelling of "extensive"   |
| Cricket    | cricket         |                                                                                     |
| Cricket    | criket          | Misspelling of cricket                                                              |
| Shuttle    | shuttle         |                                                                                     |
| Shuttle    | shuttel         | Misspelling of shuttle                                                              |
| Badminton  | b__mint__       | To include misspelling of badminton, e.g. "badminten", "batminton"                  |
| Football   | football        |                                                                                     |
| Football   | footy           |                                                                                     |
| Rugby      | rugby           |                                                                                     |
| Rugby      | rubgy           | Misspelling of rugby                                                                |
| Soccer     | soccer          |                                                                                     |
| Soccer     | socket          | Misspelling of soccer                                                               |
| Hockey     | hockey          |                                                                                     |
| Hockey     | hocky           | Misspelling of hockey                                                               |
| Wrestling  | wrestling       |                                                                                     |
| Golf       | Golf            |                                                                                     |
| Cycling    | cycling         |                                                                                     |
| Boxing     | boxing          |                                                                                     |
| Boxing     | boxer           |                                                                                     |
| Water polo | water%polo      | Wildcard to cover "waterpolo" and "water polo"                                      |
| Fencing    | fencing%sword   | sword to exclude fence building activities                                          |
| Puck       | puck[ ./>()"]   | Trailing punctuation added to exclude "pucker" and "Puckapunyal"                    |
| Racquet    | racquet         |                                                                                     |
| Racquet    | racket          | Alternative spelling of racquet                                                     |
| Stick      | stick[ ./>()"]  | Trailing punctuation added to exclude "sticky", most results not sports related     |

|      |              |                                                                        |
|------|--------------|------------------------------------------------------------------------|
| Bat  | bat[ ./>()"] | Trailing punctuation added to exclude "bath", "battery", "exacerbated" |
| Nerf | nerf         |                                                                        |

### Detailed explanation of sports included in each group in Figure 2

*Sports with less than 5 cases including archery, bubble soccer, cheerleading, climbing, dancing, dirt bike riding, fencing, fishing, frisbee, futsal, handball, horse riding, indoor football, juggling, kiteboarding, lacrosse, pilates, ping-pong, pool, rock climbing, skateboarding, skiing, skipping, snowboarding, softball, T-ball, table tennis, trampoline and weightlifting, were grouped together under the term 'other'.*

*'Water sports' include swimming, surfing, water skiing, diving and water polo.*

*'Martial arts' include aikido, boxing, jiu jitsu, judo, karate, kickboxing, martial arts, sparring, taekwondo and wrestling.*

*'Trail sports' include bush walking, running and hiking.*
